# Supplementary material for: Tunable/switchable one-dimensional photonic crystals based on a multilayer architecture of layered double hydroxides and titanium dioxide
Source: Royal Society of Chemistry journal article supplement (doi:10.1039/c2ra20790g), 2012-01-01
Supplement: c2ra20790g.pdf [file c2ra20790g.pdf]

# Supplementary Material (ESI) for RSC Advances  
# This journal is © The Royal Society of Chemistry 2011

# **Tunable/Switchable One-Dimensional Photonic Crystals Based on a Multilayer Architecture of Layered Double Hydroxides and Titanium Dioxide**

**Jingbin Han, Yibo Dou, Min Wei,\* David G. Evans, and Xue Duan**

*State Key Laboratory of Chemical Resource Engineering, Beijing University of Chemical*

*Technology, Beijing 100029, P. R. China*

\*Corresponding author. Tel: +86-10-64412131; Fax: +86-10-64425385.

E-mail address: [weimin@mail.buct.edu.cn](mailto:weimin@mail.buct.edu.cn)

## **Materials**

Titanium(IV) ethoxide ( $\text{Ti}(\text{OEt})_4$ , Ti ~20% in ethanol) was purchased from Sigma-Aldrich.  $\text{Mg}(\text{NO}_3)_2 \cdot 6\text{H}_2\text{O}$ ,  $\text{Al}(\text{NO}_3)_3 \cdot 9\text{H}_2\text{O}$ ,  $\text{HNO}_3$  and  $\text{NaOH}$  were obtained from Beijing Chemical Plant Limited and used without further purification.

## **Synthesis of MgAl-layered double hydroxide (LDH) and $\text{TiO}_2$ nanoparticles**

A colloidal LDH suspension was prepared using a method involving separate nucleation and aging steps (SNAS) developed by our group.<sup>[1]</sup> Typically, 50 ml of solution A ( $\text{Mg}(\text{NO}_3)_2 \cdot 6\text{H}_2\text{O}$ : 0.1 M and  $\text{Al}(\text{NO}_3)_3 \cdot 9\text{H}_2\text{O}$ : 0.05 M) and 50 ml of solution B ( $\text{NaOH}$ : 0.3 M) were simultaneously added to a colloid mill with rotor speed of 3000 rpm and mixed for 2 min. The resulting

suspension was removed from the colloid mill and aged at 110 °C for 12 h. The colloidal LDH suspension was obtained by thoroughly washing three times with H<sub>2</sub>O and then dispersed in 100 ml of H<sub>2</sub>O for spin-coating. Titania nanoparticles were synthesized by dropwise addition of Ti(OEt)<sub>4</sub> (6.25 mL) to a stirred solution of 0.1 M HNO<sub>3</sub> (37.5 mL) at room temperature followed by heating the mixture at 80 °C for 8 h. The resulting colloidal suspension was washed three times with H<sub>2</sub>O and then dispersed in 50 ml of H<sub>2</sub>O for casting.

### **Fabrication of the LDH/TiO<sub>2</sub> 1DPC**

To increase the surface wettability of silicon wafers, the wafers were pre-cleaned with Piranha solution for at least 30 min prior to spin-coating. Thin LDH, TiO<sub>2</sub> and LDH/TiO<sub>2</sub> multilayer films were obtained by multiple spin-coating of the aged sols on the treated Si wafers. The first layer in the LDH/TiO<sub>2</sub> film was LDH. Multilayer architectures were fabricated by repeating a multistep procedure involving spin-coating and film aging. After each casting of a LDH or TiO<sub>2</sub> layer at 2000 rpm for 30 s, the aging process was carried out at 150 °C for 3 h in order to increase the cross-linking of the inorganic framework and enhance the adhesive capacity between different layers.

### **Modulation of optical properties by calcination–rehydration treatment**

The Si wafer coated with a LDH/TiO<sub>2</sub> film was annealed at 450 °C for 1 h to produce the MMO/TiO<sub>2</sub> film with a nanoporous structure. For the reverse process, the nanoporous MMO/TiO<sub>2</sub> film was immersed into hot water (100 °C) for 30 min to recover the LDH/TiO<sub>2</sub> structure based on the “memory effect” of LDH materials. The calcination–rehydration treatment was repeated over a number of cycles.

### **Characterization techniques**

Powder X-ray diffraction (XRD) patterns of the samples were collected using a Shimadzu XRD-6000 diffractometer under the following conditions: 40 kV, 30 mA, graphite filtered Cu K $\alpha$  radiation ( $\lambda = 0.1542$  nm). Scanning electron microscopy (SEM) images were obtained on a Zeiss Supra 55 field emission scanning electron microscope. Atomic force microscopy (AFM) images were collected using a NanoScope IIIa AFM from Veeco Instruments in the tapping-mode in air. TEM images were obtained on JEOL 2010 microscope operating at 200 kV. The measurement of reflectance spectra of the 1DPCs was conducted using a dual-channel spectrometer (Beijing Purkinje General, TU-1901). The determination of layer thickness, refractive index and porosity of the films was carried out using a spectroscopic ellipsometer (Angstrom Advanced Inc. PHE-102) at an angle of 70° within the spectral range of 300–800 nm. The modeling and fitting of the ellipsometric spectra were performed using the software provided by the manufacturer. The data obtained were fitted to a Cauchy model, which assumes that the real part of the refractive index ( $n$ ) can be described by:

$$n(\lambda) = A + \frac{B}{\lambda^2} + \frac{C}{\lambda^4} \quad (1)$$

where A, B and C are constants and  $\lambda$  is the wavelength. The values of the refractive index reported in this study were determined at 633 nm. The porosity changes in the LDH and TiO<sub>2</sub> slabs during the calcination–rehydration process were determined using a reported method based on ellipsometry.<sup>[2]</sup> In brief, the refractive indices of the film were measured in air and in water using the ellipsometer. The porosity of the film was then calculated by the following equation:

$$p = \frac{n_2 - n_1}{n_w - n_a} = \frac{n_2 - n_1}{0.33} \quad (2)$$

where  $p$  is the porosity of the porous thin film;  $n_a$  and  $n_w$  represent the refractive indices of air and

water, respectively;  $n_1$  and  $n_2$  are the experimentally determined effective refractive indices of the film in air and in water, respectively.

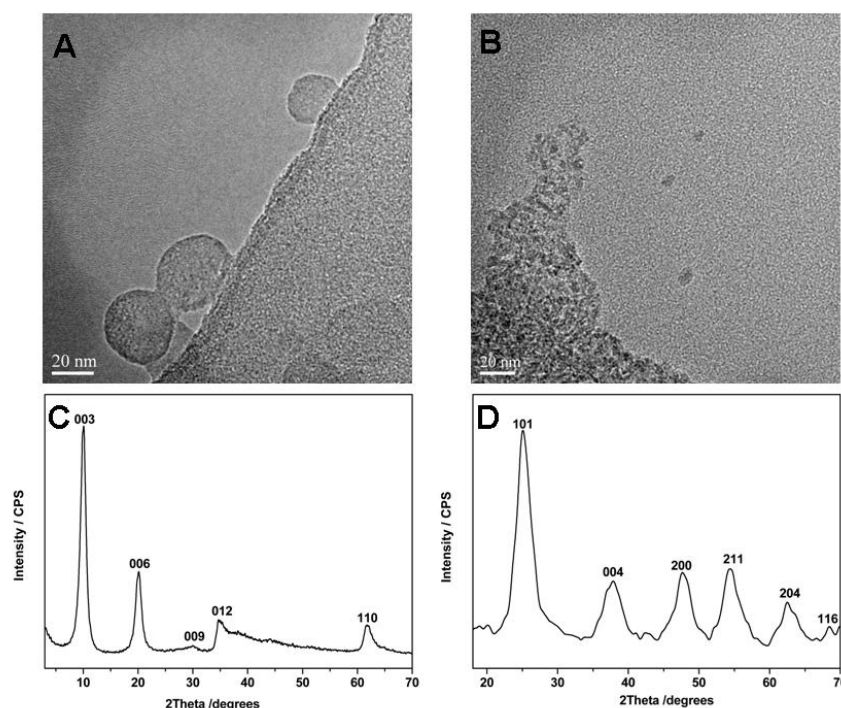

Figure S1. High-resolution TEM images of (A) LDH nanoparticles and (B) TiO<sub>2</sub> nanoparticles; XRD patterns of (C) LDH nanoparticles and (D) TiO<sub>2</sub> nanoparticles.

TiO<sub>2</sub> or LDH films were deposited by the intermittent spin-coating technique. Figure S2 shows the relationship between film thickness and number of spin-coating applications. In both cases, the film thickness displayed a linear growth as a function of spin-coating number, with a correlation of  $y_1 = 36.6 x_1$  (for the TiO<sub>2</sub> stack) and  $y_2 = 21.8 x_2$  (for the LDH stack), in which  $y$  denotes the film thickness and  $x$  represents the number of spin-coating applications. The average increment in thickness after each spin-coating process was therefore 37 and 22 nm for the TiO<sub>2</sub> and LDH films, respectively. The linear increase in thickness of the TiO<sub>2</sub> and LDH films provides a convenient way to precisely regulate the film thickness by simply varying the coating parameter.

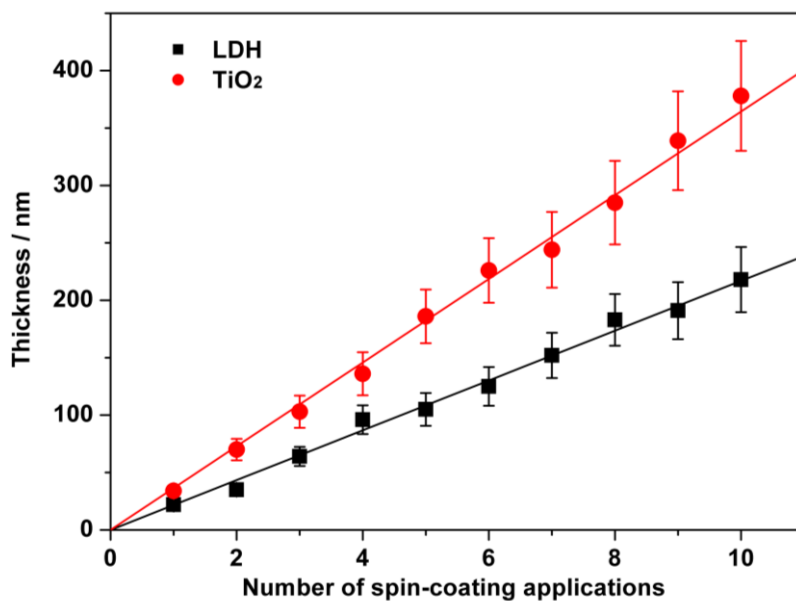

Figure S2. Dependence of the thickness of LDH and TiO<sub>2</sub> films on the number of spin-coating applications.

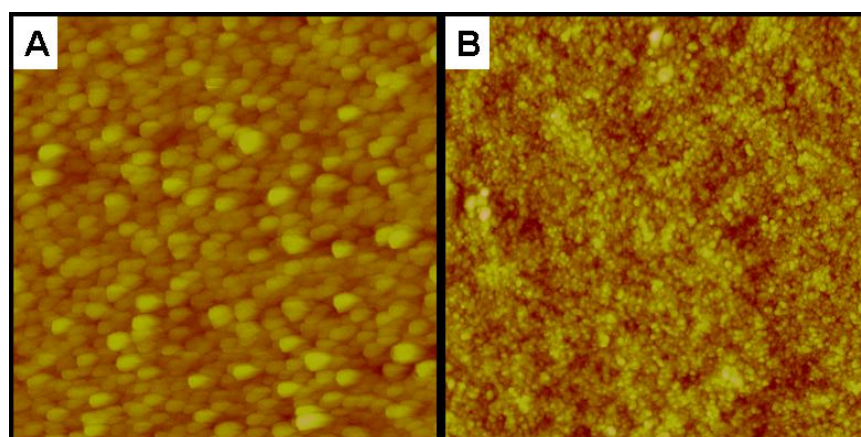

Figure S3. Tapping-mode AFM images of the LDH/TiO<sub>2</sub> films with (A) LDH ( $N = 5$ ) and (B) TiO<sub>2</sub> ( $N = 6$ ) as the terminating layer.  $N$  denotes the number of slabs in the stack (the scanning size was  $1\ \mu\text{m} \times 1\ \mu\text{m}$ ).

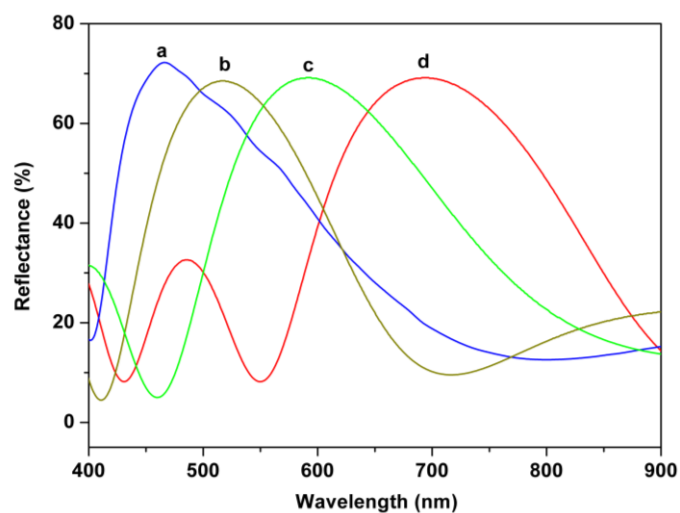

Figure S4. Changes in the reflectance spectra of the LDH/TiO<sub>2</sub> ( $N = 6$ ) 1DPCs with increasing thickness of the TiO<sub>2</sub> slabs (from a to d).

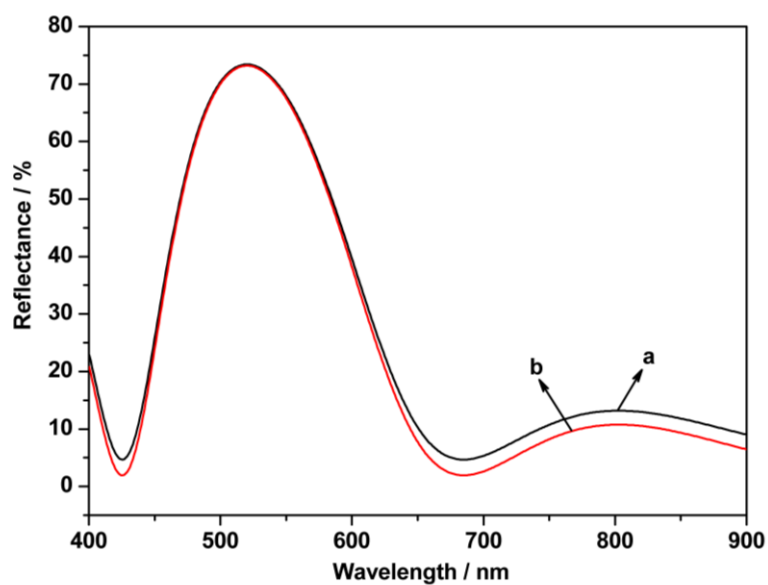

Figure S5. Reflectance spectra of the LDH/TiO<sub>2</sub> multilayer film ( $N = 6$ ) (a) before and (b) after sonication for 1 h.

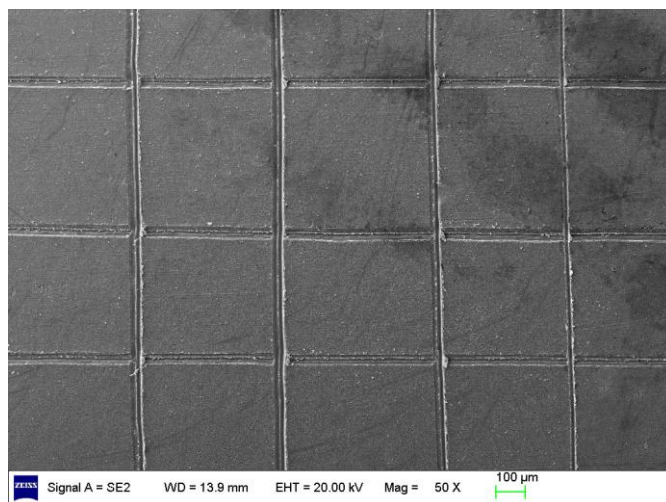

Figure S6. SEM image of the LDH/TiO<sub>2</sub> 1DPC tested for adhesion of the film to the substrate.

## Reference

- [1] Y. Zhao, F. Li, R. Zhang, D. G. Evans and X. Duan, *Chem. Mater.* 2002, **14**, 4286.
- [2] D. Lee, M. Rubner and R. E. Cohen, *Nano Lett.* 2006, **10**, 2305.
